# Supplementary material for: Coordination microenvironment perturbed single-ion magnet behavior in a β-diketone Dy(iii) complex
Source: Royal Society of Chemistry journal article supplement (doi:10.1039/d0ce00935k), 2020-01-01
Supplement: d0ce00935k8.pdf [file d0ce00935k8.pdf]

## Supporting Information

### Coordination microenvironment perturbed single-ion magnet behavior in $\beta$ -diketone Dy(III) complex

Peipei Cen,<sup>\*a#</sup> Meilin Wang,<sup>a#</sup> Xiufang Ma,<sup>b#</sup> Lei Chen,<sup>e</sup> Yi-Quan Zhang,<sup>\*c</sup> Yonghong Li,<sup>a</sup> Danian Tian,<sup>\*a</sup> and Xiangyu Liu<sup>\*b d</sup>

<sup>a</sup> College of Public Health and Management, Ningxia Medical University, Yinchuan 750021, China

<sup>b</sup> State Key Laboratory of High-efficiency Utilization of Coal and Green Chemical Engineering, National Demonstration Center for Experimental Chemistry Education, College of Chemistry and Chemical Engineering, Ningxia University, Yinchuan 750021, China

<sup>c</sup> Jiangsu Key Laboratory for NSLSCS, School of Physical Science and Technology, Nanjing Normal University, Nanjing 210023, China

<sup>d</sup> State Key Laboratory of Coordination Chemistry, Nanjing University, Nanjing, 210023, China

<sup>e</sup> School of Material Science and Engineering, Jiangsu University of Science and Technology, Zhenjiang 212003, China

# These authors contributed equally to this work

#### \*Corresponding author

**Dr. Peipei Cen; Dr. Danian Tian**

**E-mail: 13895400691@163.com; tiandanian@163.com**

#### \*Corresponding author

**Dr. Xiangyu Liu**

**E-mail: xiangyuliu432@126.com**

#### \*Corresponding author

**Prof. Yi-Quan Zhang**

**E-mail: zhangyiquan@njnu.edu.cn**

## Contents

**Fig. S1** IR curves of **1**.

**Fig. S2** Molecular stacking charts of complex **1**. H atoms and free chloride ion are omitted for clarity.

**Fig. S3** PXRD curves of **1**.

**Fig. S4** Temperature dependence of  $\chi'$  and  $\chi''$  susceptibilities for **1** without static field.

**Fig. S5** Cole-Cole plots at  $H_{dc} = 0$  Oe for **1**. The solid lines represent the best fit to the measured results.

**Fig. S6** Temperature dependence of  $\chi'$  and  $\chi''$  susceptibilities for **1** at applied dc fields of 1200 Oe.

**Fig. S7** Calculated model structures of Dy<sup>III</sup> fragment of **1**. H atoms are omitted.

**Table S1.** Selected bond lengths (Å) and bond angles (°) for **1**.

**Table S2.** Dy (III) ion geometry analysis of **1** by SHAPE 2.1 software.

**Table S3.** Relevant structural parameters in square anti-prism geometry,  $\alpha$  angle and  $\phi$  angle.

**Table S4.** Crystal field parameters for **1** fitted from  $M$  vs.  $H$ .

**Table S5.** Energy levels and eigenstates for **1**.

**Table S6.** Relaxation fitting parameters from least-squares fitting of  $\chi(f)$  data under zero dc field of **1**.

**Table S7.** Relaxation fitting parameters from least-squares fitting of  $\chi(f)$  data under 1200 Oe dc field of **1**.

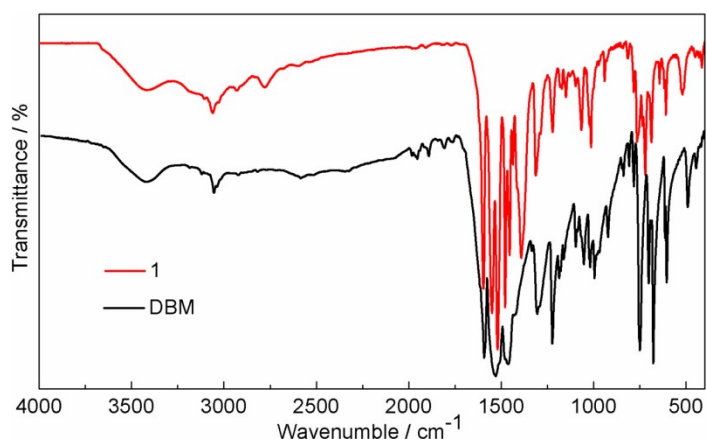

Fig. S1 IR curves of 1.

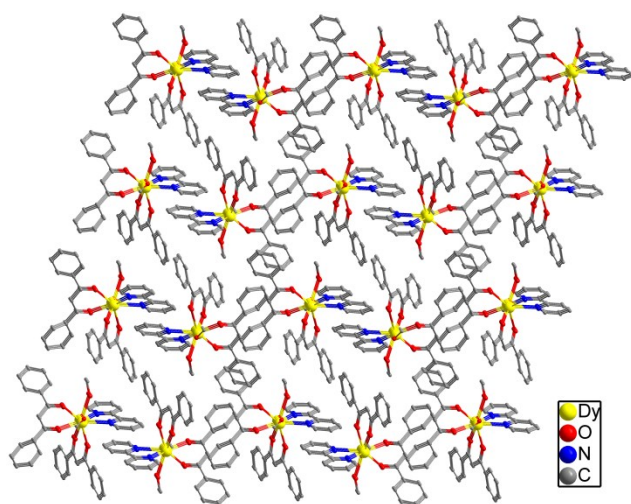

Fig. S2 Molecular stacking charts of complex 1. H atoms and free chloride ion are omitted for clarity.

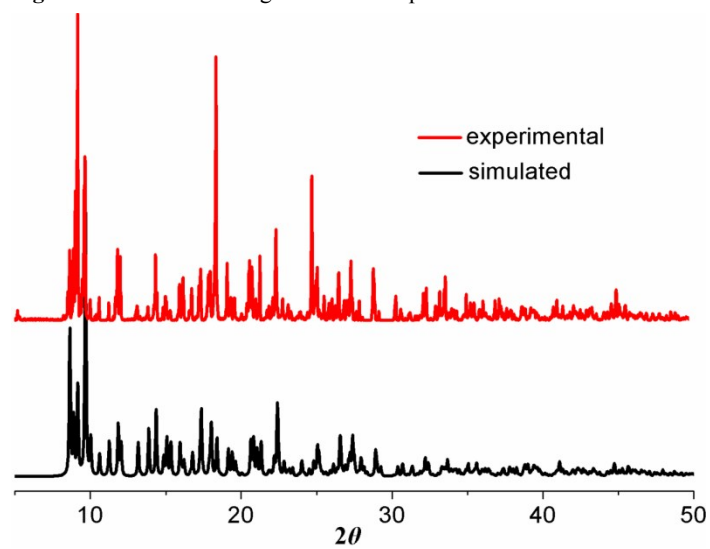

Fig. S3 PXRD curves of 1.

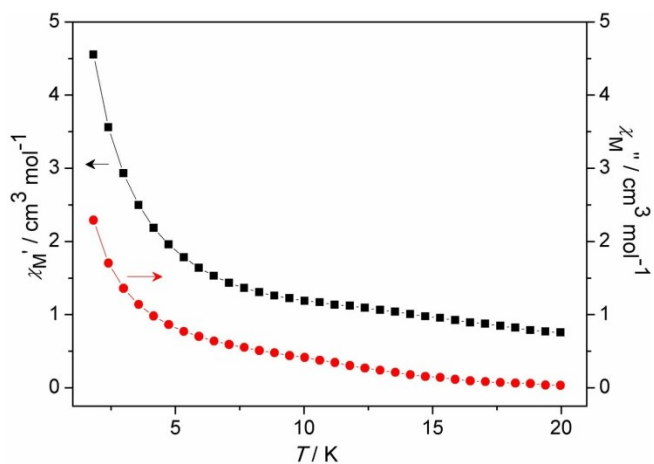

**Fig. S4** Temperature dependence of  $\chi'$  and  $\chi''$  susceptibilities for **1** without static field.

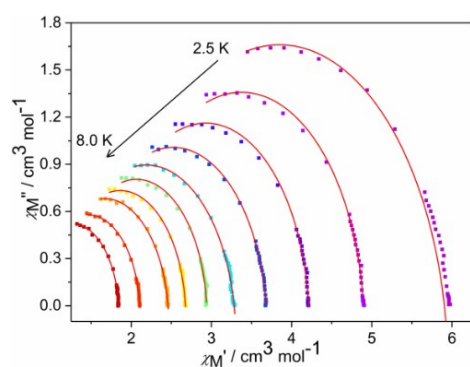

**Fig. S5** Cole-Cole plots at  $H_{dc} = 0$  Oe for **1**. The solid lines represent the best fit to the measured results.

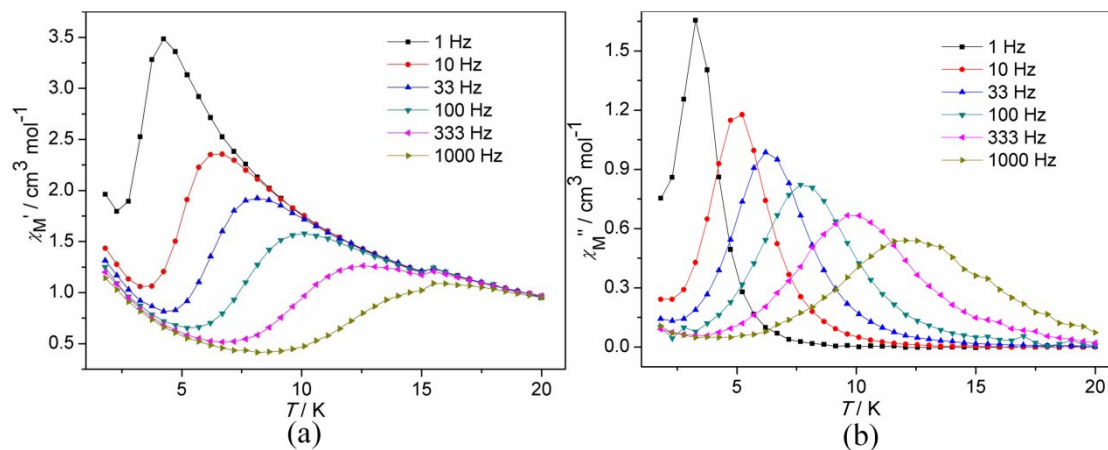

**Fig. S6** Temperature dependence of  $\chi'$  and  $\chi''$  susceptibilities for **1** at applied dc fields of 1200 Oe.

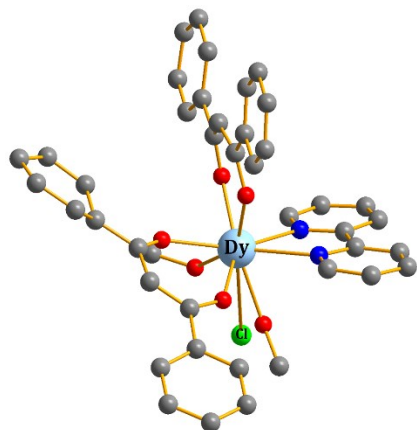

**Fig. S7** Calculated model structures of Dy<sup>III</sup> fragment of **1**. H atoms are omitted.

**Table S1.** Selected bond lengths (Å) and bond angles (°) for **1**.

| Complex <b>1</b> |            |                  |            |
|------------------|------------|------------------|------------|
| Dy(1)-O(1)       | 2.295(3)   | Dy(1)-O(2)       | 2.293(2)   |
| Dy(1)-O(3)       | 2.295(2)   | Dy(1)-O(4)       | 2.275(3)   |
| Dy(1)-O(5)       | 2.446(3)   | Dy(1)-O(6)       | 2.402(3)   |
| Dy(1)-N(1)       | 2.545(3)   | Dy(1)-N(2)       | 2.569(3)   |
| O(1)-Dy(1)-O(2)  | 73.57(8)   | O(1)-Dy(1)-O(3)  | 146.70(9)  |
| O(1)-Dy(1)-O(4)  | 79.15(10)  | O(1)-Dy(1)-O(5)  | 136.71(9)  |
| O(1)-Dy(1)-O(6)  | 77.43(9)   | O(1)-Dy(1)-N(1)  | 112.08(9)  |
| O(1)-Dy(1)-N(2)  | 72.00(9)   | O(2)-Dy(1)-O(3)  | 83.72(8)   |
| O(2)-Dy(1)-O(4)  | 81.99(10)  | O(2)-Dy(1)-O(5)  | 142.98(8)  |
| O(2)-Dy(1)-O(6)  | 145.70(9)  | O(5)-Dy(1)-N(2)  | 74.59(9)   |
| O(3)-Dy(1)-N(2)  | 139.02(9)  | O(4)-Dy(1)-O(5)  | 118.91(10) |
| O(4)-Dy(1)-O(6)  | 74.86(11)  | O(4)-Dy(1)-N(1)  | 147.39(11) |
| O(4)-Dy(1)-N(2)  | 146.21(10) | O(5)-Dy(1)-O(6)  | 71.28(8)   |
| O(5)-Dy(1)-N(1)  | 74.82(8)   | O(5)-Dy(1)-N(2)  | 74.59(9)   |
| O(6)-Dy(1)-N(1)  | 136.45(10) | O(6)-Dy(1)-N(2)  | 81.91(10)  |
| N(1)-Dy(1)-N(2)  | 63.12(10)  | Dy(1)-O(1)-C(17) | 136.1(2)   |
| C(43)-O(6)-H(6A) | 114.00     | Dy(1)-N(1)-C(1)  | 119.8(2)   |
| Dy(1)-N(1)-C(5)  | 122.5(3)   | C(1)-N(1)-C(5)   | 117.7(3)   |

**Table S2.** Dy (III) ion geometry analysis of **1** by SHAPE 2.1 software.

Dy (III) ion geometry analysis of **1**

|                  |                    |                                            |        |        |         |          |         |        |        |         |         |
|------------------|--------------------|--------------------------------------------|--------|--------|---------|----------|---------|--------|--------|---------|---------|
| HPY-8            | 3 D <sub>6h</sub>  | Hexagonal bipyramid                        |        |        |         |          |         |        |        |         |         |
| CU-8             | 4 O <sub>h</sub>   | Cube                                       |        |        |         |          |         |        |        |         |         |
| SAPR-8           | 5 D <sub>4d</sub>  | Square antiprism                           |        |        |         |          |         |        |        |         |         |
| TDD-8            | 6 D <sub>2d</sub>  | Triangular dodecahedron                    |        |        |         |          |         |        |        |         |         |
| JGBF-8           | 7 D <sub>2d</sub>  | Johnson gyrobifastigium J26                |        |        |         |          |         |        |        |         |         |
| JETBPY-8         | 8 D <sub>3h</sub>  | Johnson elongated triangular bipyramid J14 |        |        |         |          |         |        |        |         |         |
| JBTPR-8          | 9 C <sub>2v</sub>  | Biaugmented trigonal prism J50             |        |        |         |          |         |        |        |         |         |
| BTPR-8           | 10 C <sub>2v</sub> | Biaugmented trigonal prism                 |        |        |         |          |         |        |        |         |         |
| JSD-8            | 11 D <sub>2d</sub> | Snub diphenoid J84                         |        |        |         |          |         |        |        |         |         |
| TI-8             | 12 T <sub>d</sub>  | Triakis tetrahedron                        |        |        |         |          |         |        |        |         |         |
| ETBPY-8          | 13 D <sub>3h</sub> | Elongated trigonal bipyramid               |        |        |         |          |         |        |        |         |         |
| Structure [ML8 ] | HPY-8              | CU-8                                       | SAPR-8 | TDD-8  | JGBF-8  | JETBPY-8 | JBTPR-8 | BTPR-8 | JSD-8  | TI-8    | ETBPY-8 |
| ABOXIY           | , 16.954,          | 10.092,                                    | 0.535, | 2.053, | 16.149, | 28.292,  | 2.801,  | 2.132, | 4.907, | 10.880, | 24.113  |

| Configuration                                           | ABOXIY, 1 |
|---------------------------------------------------------|-----------|
| Hexagonal bipyramid ( $D_{6h}$ )                        | 16.954    |
| Cube ( $O_h$ )                                          | 10.092    |
| Square antiprism ( $D_{4d}$ )                           | 0.535     |
| Triangular dodecahedron ( $D_{2d}$ )                    | 2.053     |
| Johnson gyrobifastigium J26 ( $D_{2d}$ )                | 16.149    |
| Johnson elongated triangular bipyramid J14 ( $D_{3h}$ ) | 28.292    |
| Biaugmented trigonal prism J50 ( $C_{2v}$ )             | 2.801     |
| Biaugmented trigonal prism ( $C_{2v}$ )                 | 2.132     |
| Snub sphenoid J84 ( $D_{2d}$ )                          | 4.907     |
| Triakis tetrahedron ( $T_d$ )                           | 10.880    |
| Elongated trigonal bipyramid ( $D_{3h}$ )               | 24.113    |

**Table S3.** Relevant structural parameters in square anti-prism geometry,  $\alpha$  angle and  $\phi$  angle.

| $\alpha$ angle (°)        | 1      | $\phi$ angle (°)          | 1      |
|---------------------------|--------|---------------------------|--------|
| O1                        | 60.536 | O1-Dy-O4                  | 42.886 |
| O2                        | 58.114 | O1-Dy-O6                  | 45.198 |
| N1                        | 51.539 | O2-Dy-O3                  | 47.434 |
| N2                        | 47.675 | O2-Dy-O4                  | 44.612 |
| O3                        | 58.114 | O3-Dy-N1                  | 46.072 |
| O4                        | 61.815 | O5-Dy-N1                  | 41.992 |
| O5                        | 57.085 | O5-Dy-N2                  | 43.992 |
| O6                        | 54.675 | O6-Dy-N2                  | 48.061 |
| Deviation                 | 56.194 | Deviation                 | 45.031 |
| Sum of deviation to ideal | 1.454  | Sum of deviation to ideal | 0.031  |
| 54.74°                    |        | 45°                       |        |

**Table S4.** Crystal field parameters and g-factors for **1** fitted from  $M$  vs.  $H$ .

| <b>1</b> |       |
|----------|-------|
| $B_2^0$  | 362.8 |
| $B_4^0$  | 685.7 |
| $B_6^0$  | 337.1 |

**Table S5.** Energy levels and eigenstates for **1**.

| Energy / $\text{cm}^{-1}$ | Eigenstate |
|---------------------------|------------|
| 0                         | $\pm 1/2$  |
| 85                        | $\pm 15/2$ |
| 189                       | $\pm 13/2$ |
| 374                       | $\pm 3/2$  |
| 943                       | $\pm 5/2$  |
| 966                       | $\pm 11/2$ |
| 1407                      | $\pm 7/2$  |
| 1460                      | $\pm 9/2$  |

**Table S6.** Relaxation fitting parameters from least-squares fitting of  $\chi(f)$  data under zero dc field of **1**.

| $T(\text{K})$ | $\chi_T$ | $\chi_S$ | $\alpha$ |
|---------------|----------|----------|----------|
| 2.5           | 5.906    | 1.796    | 0.135    |
| 3             | 4.897    | 1.859    | 0.071    |
| 3.5           | 4.211    | 1.649    | 0.062    |
| 4             | 3.684    | 1.364    | 0.089    |
| 4.5           | 3.284    | 1.099    | 0.126    |
| 5             | 2.940    | 1.192    | 0.053    |
| 5.5           | 2.676    | 1.051    | 0.066    |
| 6             | 2.459    | 0.881    | 0.093    |
| 7             | 2.108    | 0.822    | 0.067    |
| 8             | 1.842    | 0.691    | 0.063    |

**Table S7.** Relaxation fitting parameters from least-squares fitting of  $\chi(f)$  data under 1200 Oe dc field of **1**.

| $T(\text{K})$ | $\chi_T$ | $\chi_S$ | $\alpha$ |
|---------------|----------|----------|----------|
| 3.5           | 5.871    | 0.781    | 0.212    |

---

|      |       |       |       |
|------|-------|-------|-------|
| 3.8  | 4.676 | 0.775 | 0.118 |
| 4    | 4.379 | 0.753 | 0.096 |
| 4.2  | 4.197 | 0.778 | 0.077 |
| 4.5  | 3.922 | 0.669 | 0.082 |
| 5    | 3.524 | 0.607 | 0.073 |
| 5.5  | 3.221 | 0.533 | 0.081 |
| 6    | 2.958 | 0.448 | 0.074 |
| 6.5  | 2.042 | 0.346 | 0.043 |
| 7    | 2.750 | 0.430 | 0.054 |
| 7.5  | 2.579 | 0.455 | 0.065 |
| 8    | 2.442 | 0.409 | 0.046 |
| 8.5  | 2.279 | 0.389 | 0.045 |
| 9    | 2.151 | 0.375 | 0.039 |
| 9.5  | 1.938 | 0.351 | 0.029 |
| 10   | 1.849 | 0.331 | 0.035 |
| 10.5 | 1.769 | 0.277 | 0.036 |
| 11   | 1.687 | 0.305 | 0.036 |

---
