# Supplementary figures and images for: Coordination microenvironment perturbed single-ion magnet behavior in a β-diketone Dy(iii) complex
Source: Royal Society of Chemistry journal article supplement (doi:10.1039/d0ce00935k), 2020-01-01

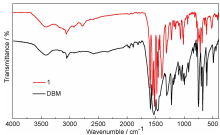

Supplement: d0ce00935k1.pdf [file d0ce00935k1.pdf]

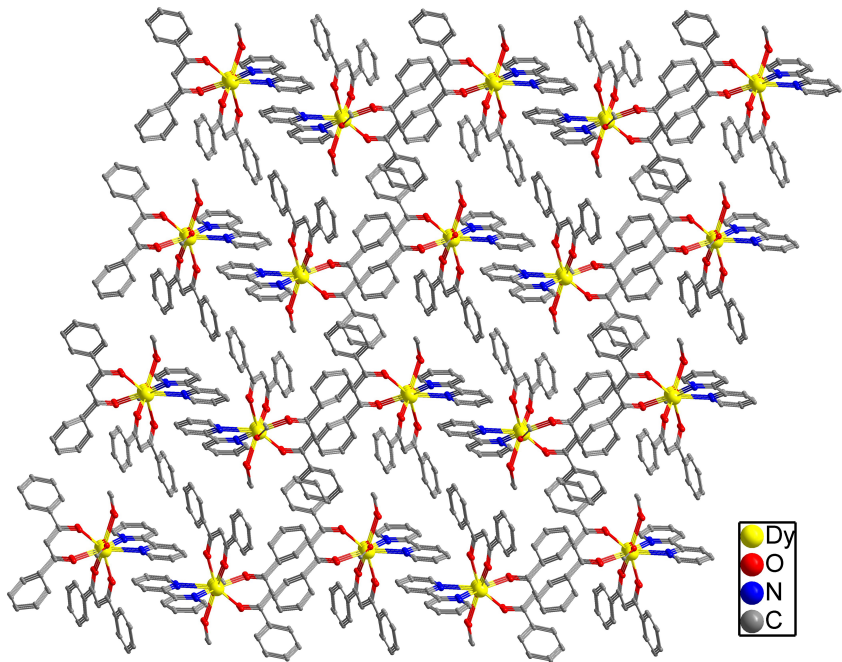

Supplement: d0ce00935k2.pdf [file d0ce00935k2.pdf]

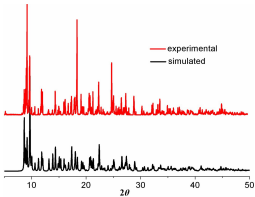

Supplement: d0ce00935k3.pdf [file d0ce00935k3.pdf]

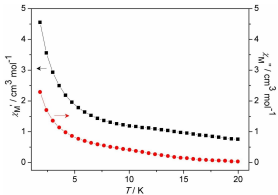

Supplement: d0ce00935k4.pdf [file d0ce00935k4.pdf]

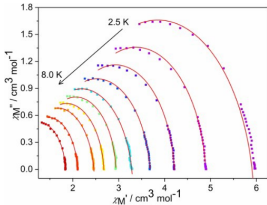

Supplement: d0ce00935k5.pdf [file d0ce00935k5.pdf]

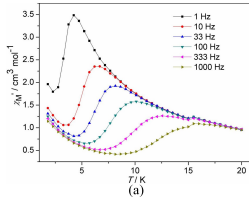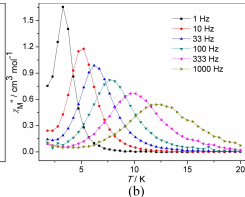

Supplement: d0ce00935k6.pdf [file d0ce00935k6.pdf]

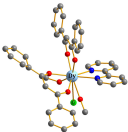

Supplement: d0ce00935k7.pdf [file d0ce00935k7.pdf]
